# Supplementary material for: Downscaled Climate Change Projections in Urban Centers of Southwest Ethiopia Using CORDEX Africa Simulations
Source: MDPI journal article supplement (doi:10.3390/cli10100158), 2022-10-21
Supplement: s1 [file s1]

## Supplementary Tables

Table S1. Representative Concentration Pathways (RCPs) and equivalent emission scenarios in Special report on emission scenarios (SRES) and Shared Socio-Economic Pathways (SSP)

| RCP     | Description                                                                                                                                                                   | Emission                                                                                                    | Equivalent SRES/SSPs | Remark                                                                                                                                                                                                                                                                                              |
|---------|-------------------------------------------------------------------------------------------------------------------------------------------------------------------------------|-------------------------------------------------------------------------------------------------------------|----------------------|-----------------------------------------------------------------------------------------------------------------------------------------------------------------------------------------------------------------------------------------------------------------------------------------------------|
| RCP 8.5 | Rising radiative forcing pathway leading to 8.5 w/m <sup>2</sup> (>1370 ppm Co <sub>2</sub> eq) by 2100                                                                       | High emission scenarios (possible development in the case of high population numbers, high fossil/coal use) | A1F1/SSP5            | Radiative forcing values were approximated and defined as ±5% of the stated level w/m <sup>2</sup> relative to pre-industrial levels and including net effects of all anthropogenic GHGs and other forcing agents. The new shared socio-economic pathway to be used in the future also incorporated |
| RCP 6.0 | Stabilization without overshoot pathway to 6 w/m <sup>2</sup> (~850 ppm Co <sub>2</sub> eq) at stabilization after 2100                                                       | Medium range emission scenarios (low, medium baseline scenario or high mitigation scenario)                 | B2/SSP4              |                                                                                                                                                                                                                                                                                                     |
| RCP4.5  | Stabilization without overshoot pathway to 4.5 w/m <sup>2</sup> (~650 ppm Co <sub>2</sub> eq) at stabilization after 2100                                                     | Medium range emission scenarios (high mitigation scenarios)                                                 | B1/SSP3              |                                                                                                                                                                                                                                                                                                     |
| RCP 2.6 | The peak in radiative forcing at 3 w/m <sup>2</sup> (~490 ppm Co <sub>2</sub> eq) before 2100 and the decline (the selected pathway declines to 2.6 w/m <sup>2</sup> by 2100) | Low emission scenarios (low mitigation scenarios)                                                           | None/SSP1            |                                                                                                                                                                                                                                                                                                     |

\*Compiled by Author which adapted from IPCC AR5 (2014) and (Van Vureen et al., 2011; Moss et al., 2010) also based on new socio-economic scenarios by Riahi et al (2021).

Table S2. Comparison of previous studies conducted in different parts of Ethiopia

| Model                                                  |                                | Temperature                                                                                                                                 | Precipitation                                                                                                                                                                                                                                                                      | References             |
|--------------------------------------------------------|--------------------------------|---------------------------------------------------------------------------------------------------------------------------------------------|------------------------------------------------------------------------------------------------------------------------------------------------------------------------------------------------------------------------------------------------------------------------------------|------------------------|
| ECHAM 5 and HADCM3                                     | Across Ethiopia and Kenya      | Clear trends at all locations towards warmer conditions in the future.                                                                      | ECHAM5 model shows a The trend towards wetter annual conditions over most parts                                                                                                                                                                                                    | Ward and Lasage,2009   |
| HadCM3 A2 and B2                                       | Lake Hawasa                    | Maximum temperature increase by 1.6–1.8 oC and minimum Temperature by 1.54–1.7 oC in 2050.                                                  | Trends in annual rainfall do not show statistically meaningful trends between Years.                                                                                                                                                                                               | Gebrie et al., 2012    |
| HadCM3 A2a                                             | Northwestern Ethiopia          | The increase in mean maximum and minimum temperature ranges from 1.55–6.07 oC and from 0.11–2.81 oC, respectively, in the 2080s.            | Decrease in the amount of annual rainfall and number of rainy days in the 2080s.                                                                                                                                                                                                   | Ayalew et al.,2012     |
| CGCM3.1 and REMO                                       | Baro-Akobo Basin               | The maximum temperature rises by 1.3 oC (REMO A1B and B1) and 2.55 oC (CGCM3.1).                                                            | 24% (REMO) and 23% (CGCM3.1) rise in 2050.                                                                                                                                                                                                                                         | Kebede et al.,2013     |
| KNMI at (0.44 <sup>0</sup> )                           | Shashamane City                | Under RCP 8.5 multi-model mean warming minimum temperature by 3oC and maximum temperature 2.5 oC by 2060 and more in the end of the century | Wettest months decrease between 10-20% (5% percentile ) and decrease by a median estimate from 0 -10%decrease with the base period, in driest months10-20 % increase                                                                                                               | Bambrick et al. , 2015 |
| HadCM3-A2                                              | Upper Blue Nile Basin          | The minimum and maximum The temperature will increase by 3.6 oC and 2.4 oC, respectively, towards the end of the 21st century.              | Dry season rainfall amounts are likely to increase and wet Season rainfall to decrease.                                                                                                                                                                                            | Worqlul et al.,2018    |
| CanESM2and CGCM3 under RCP 4.5 and 8.5 SRES A1B and B2 | Addis Ababa City               | Maximum temperature changes from 0.9oC in 2020 to 2.1 oC in 2080's and minimum temperature from 0.3oC in 2020 to 1 oC                       | The total precipitation increased from 29% in winter and 20.8% by 2020 in summer (RCP 8.5) by 2080s                                                                                                                                                                                | Feyissa et al. ,2018   |
| HadCM3 A2a and B2a and CanESM2 RCP2.6,4.5 and 8.5)     | Upper Blue Nile River Basin    | Maximum temperature rise by 0.4 oC to 2.9 oC and minimum temperature rise by 0.3 to 1.6 oC.                                                 | Relative changes in mean annual precipitation range From 2.1–43.8%.                                                                                                                                                                                                                | Mekonin et al., 2018   |
| (CORDEX) Africa experiment outputs                     | Ethiopia at the national level | Temperature is not included in the study                                                                                                    | The wet (dry) spells were projected to decrease (increase) over most parts of Ethiopia, with relatively longer (shorter) dry (wet) spells projected over northern Ethiopia, projected changes in extreme precipitation at 95 percentile with higher values in the southern region. | G.Tegegne et al.,2020  |
| A1B                                                    | Baro Akobo                     | Mean temperature increase 1oC to 3.5 oC in 2040 and 2090 respectively with reference to base 1989-2018                                      | Precipitation decreased by 1.8% in 2040's and increased of 1.8%by2090 with inconsistent change                                                                                                                                                                                     | Muleta, T.N.,2021      |

Compiled by the author based on relevant climate projection studies in different parts of Ethiopia, 2021

Table S3. Areal average of models monthly maximum temperature (tasmax), minimum temperature (tasmin) and precipitation (pr) with the reference period (1981-2010), 2030 near, 2050 middle and 2080 long term period of the twenty-first century.

| no  | Variable                 | period   | Jan         | Feb         | Mar         | Apr         | May         | Jun   | Jul         | Aug         | Sep   | Oct         | Nov         | Dec         | Mean   |
|-----|--------------------------|----------|-------------|-------------|-------------|-------------|-------------|-------|-------------|-------------|-------|-------------|-------------|-------------|--------|
|     |                          |          |             |             |             |             |             |       |             |             |       |             |             |             |        |
| I   | Tasmax(oC)               | observed | 27.8        | <b>28.7</b> | <b>28.7</b> | 28.0        | 26.8        | 25.2  | <b>23.9</b> | 24.1        | 25.1  | 26.0        | 26.8        | 27.2        | 26.5   |
|     |                          | 2030     | 28.1        | <b>30.6</b> | <b>30.9</b> | 29.9        | 27.0        | 24.6  | 22.0        | <b>21.7</b> | 23.4  | 25.1        | 25.7        | 26.2        | 26.3   |
|     |                          | 2050     | 29.8        | <b>31.9</b> | <b>32.4</b> | <b>30.9</b> | 28.4        | 26.1  | 23.3        | <b>23.1</b> | 24.6  | 26.3        | 26.9        | 27.7        | 27.6   |
|     |                          | 2080     | <b>31.5</b> | <b>33.9</b> | <b>33.9</b> | <b>32.3</b> | <b>30.0</b> | 28.7  | 25.4        | <b>25.0</b> | 26.3  | 27.8        | 28.5        | 29.4        | 29.4   |
| II  | Tasmin (oC)              | observed | 14.5        | 16.1        | <b>17</b>   | 16.5        | 15.8        | 17    | 15.2        | 15          | 15.5  | <b>14.2</b> | 14.3        | 15.3        | 15.5   |
|     |                          | 2030     | 14.6        | 16.0        | 17.0        | <b>17.1</b> | 16.5        | 15.7  | 15.0        | 15.1        | 15.6  | 15.1        | 14.4        | <b>14.3</b> | 15.5   |
|     |                          | 2050     | 16.2        | 17.6        | <b>18.5</b> | <b>18.5</b> | 17.8        | 17.0  | 16.3        | 16.3        | 16.8  | 16.6        | 15.8        | <b>15.7</b> | 16.9   |
|     |                          | 2080     | 18.2        | 19.7        | <b>20.4</b> | 20.2        | 19.4        | 18.7  | 18.0        | 18.0        | 18.5  | 18.3        | <b>17.6</b> | <b>17.6</b> | 18.7   |
| III | Precipitation (mm/month) | observed | 26.9        | 44.5        | 87.2        | 123.7       | 162.7       | 199.1 | 201.4       | 201.0       | 172.1 | 91.7        | 35.9        | 29.7        | 1375.9 |
|     |                          | 2030     | 8.3         | 13.1        | 42.6        | 107.4       | 187.2       | 175.4 | 156.5       | 163.0       | 180.5 | 136.7       | 74.3        | 27.4        | 1272.4 |
|     |                          | 2050     | 6.1         | 12.1        | 43.4        | 116.9       | 179.5       | 164.5 | 145.5       | 159.5       | 178.9 | 148.9       | 68.6        | 20.8        | 1244.7 |
|     |                          | 2080     | 6.8         | 12.9        | 54.6        | 116.1       | 155.5       | 139.9 | 144.9       | 150.5       | 176.3 | 155.9       | 70.5        | 20.3        | 1204.2 |

Table S4. Analysis of spatial interpolation of multi models averages of four study stations/urban centers during the historical period(1971-2005), near 2030 (2011-2040), middle 2050 (2041-2070), and long term 2080 (2071-2100) under RCP8.5.

| id | Station | Latitude | Longitude | Altitude | Maximum temperature  |                 |                 |                 | Minimum temperature  |                 |                |                     | Precipitation    |             |             |             |
|----|---------|----------|-----------|----------|----------------------|-----------------|-----------------|-----------------|----------------------|-----------------|----------------|---------------------|------------------|-------------|-------------|-------------|
|    |         |          |           |          | Historical<br>tasmax | tasmax1<br>2030 | tasmax2<br>2050 | tasmax3<br>2080 | Historical<br>Tasmin | tasmin1<br>2030 | tasmin<br>2050 | tasmin<br>3<br>2080 | Historical<br>Pr | Pr1<br>2050 | pr2<br>2050 | pr3<br>2080 |
| 1  | Jimma   | 7.66     | 36.83     | 1725     | 24.3                 | 25.5            | 26.9            | 28.7            | 13.9                 | 14.9            | 16.1           | 17.6                | 126.7            | 127.6       | 118.5       | 115         |
| 2  | Bedelle | 8.45     | 36.33     | 2030     | 25.7                 | 26.7            | 28.1            | 30              | 14.9                 | 16              | 17.3           | 19                  | 145.6            | 143.1       | 136.2       | 121         |
| 3  | Bonga   | 7.22     | 36.23     | 1650     | 24.6                 | 25.7            | 27.1            | 28.8            | 14.3                 | 15.5            | 16.9           | 18.6                | 85.4             | 81.7        | 76.2        | 77.9        |
| 4  | Sokoru  | 7.92     | 37.4      | 2100     | 25.6                 | 27.1            | 28.4            | 30.1            | 13.9                 | 14.9            | 16.1           | 17.6                | 146.5            | 143.6       | 142.8       | 145         |

Table S5. Computed Areal average of models monthly, seasonal and annual changes for maximum temperature(tasmax), minimum temperature (tasmin) and precipitation (pr) with the reference period (1981-2010), 2030 near, 2050 middle and 2080 long term periods.

| No. | Variable                 | period   | Monthly Average | Change   | Winter | Change   | Spring | Change   | Summer | Change   | Autumn | Change   | Annual | Change | %        | Remark   |
|-----|--------------------------|----------|-----------------|----------|--------|----------|--------|----------|--------|----------|--------|----------|--------|--------|----------|----------|
| I   | Tasmax(oC)               | observed | 26.5            | base     | 28.4   | base     | 26.7   | base     | 24.4   | base     | 26.7   | base     | 26.5   | base   | base     | base     |
|     |                          | 2030     | 26.3            | -0.2     | 29.9   | 1.5      | 27.2   | 0.5      | 22.4   | -2.0     | 25.7   | 1.5      | 26.3   | -0.3   | -0.90%   | decrease |
|     |                          | 2050     | 27.6            | 1.1      | 31.4   | 3.0      | 28.5   | 1.8      | 23.7   | -0.7     | 27.0   | 3.0      | 27.6   | 1.1    | 4.20%    | increase |
|     |                          | 2080     | 29.4            | 2.9      | 33.1   | 4.7      | 30.3   | 3.7      | 25.6   | 1.2      | 28.6   | 4.7      | 29.4   | 2.9    | 10.40%   | increase |
| II  | Tasmin (oC)              | observed | 15.5            | base     | 15.9   | base     | 16.4   | base     | 15.2   | base     | 14.6   | base     | 15.5   | base   | base     | base     |
|     |                          | 2030     | 15.6            | 0.1      | 16.3   | 0.4      | 16.8   | 0.4      | 16.0   | 0.8      | 15.6   | 0.4      | 16.2   | 0.7    | 4.40%    | increase |
|     |                          | 2050     | 16.9            | 1.4      | 17.4   | 1.5      | 17.8   | 1.4      | 16.5   | 1.3      | 16.0   | 1.5      | 16.9   | 1.4    | 9.02%    | increase |
|     |                          | 2080     | 18.7            | 3.2      | 19.4   | 3.5      | 19.4   | 3.0      | 18.2   | 3.0      | 17.8   | 3.5      | 18.7   | 3.2    | 20.55%   | increase |
| III | Precipitation (mm/month) | observed | 1375.9          | base     | 158.6  | base     | 485.5  | base pr  | 574.5  | base     | 157.3  | base     | 1375.9 | base   | base     | base     |
|     |                          | 2030     | 1272.4          | -7.50%   | 64.0   | -59.60%  | 470.0  | -3.20%   | 500    | -12.97%  | 238.4  | 51.56%   | 1272.4 | -103.5 | -7.52%   | decrease |
|     |                          | 2050     | 1244.7          | -2.00%   | 61.6   | -61.20%  | 460.9  | -5.10%   | 483.9  | -15.77%  | 238.3  | 51.50%   | 1244.7 | -131.2 | -9.54%   | decrease |
|     |                          | 2080     | 1204.2          | -2.90%   | 74.3   | -53.20%  | 411.5  | -15.24%  | 471.7  | -17.89%  | 246.7  | 56.83%   | 1204.2 | -171.7 | -12.50%  | decrease |
|     |                          | pr       |                 | decrease |        | decrease |        | decrease |        | decrease |        | increase |        |        | decrease |          |

Note: Absolute change for temperature and percentage change for precipitation with reference to the base period 1981-2010 was analyzed by Author computation, 2021
